# Supplementary material
Source: ML conference proceedings conference paper supplement (https://openaccess.thecvf.com/content/cvpr_2017/html/Sheinin_Computational_Imaging_on_2017_CVPR_paper.html)
Supplement: Supplementary file 1 [file Sheinin_Computational_Imaging_on_2017_CVPR_supplemental.pdf]

Archive with 2 entries (2 files):
- 2872-supp.pdf
- SupplementaryVideos.mp4
